# Supplementary material for: Meta-Analysis of the Prevalence of Echinococcus in Sheep in China From 1983 to 2020
Source: PubMed Central journal article supplement (PMC8350519; doi:10.3389/fcimb.2021.711332), 2021-07-26
Supplement: DataSheet_4.pdf [file DataSheet_4.pdf]

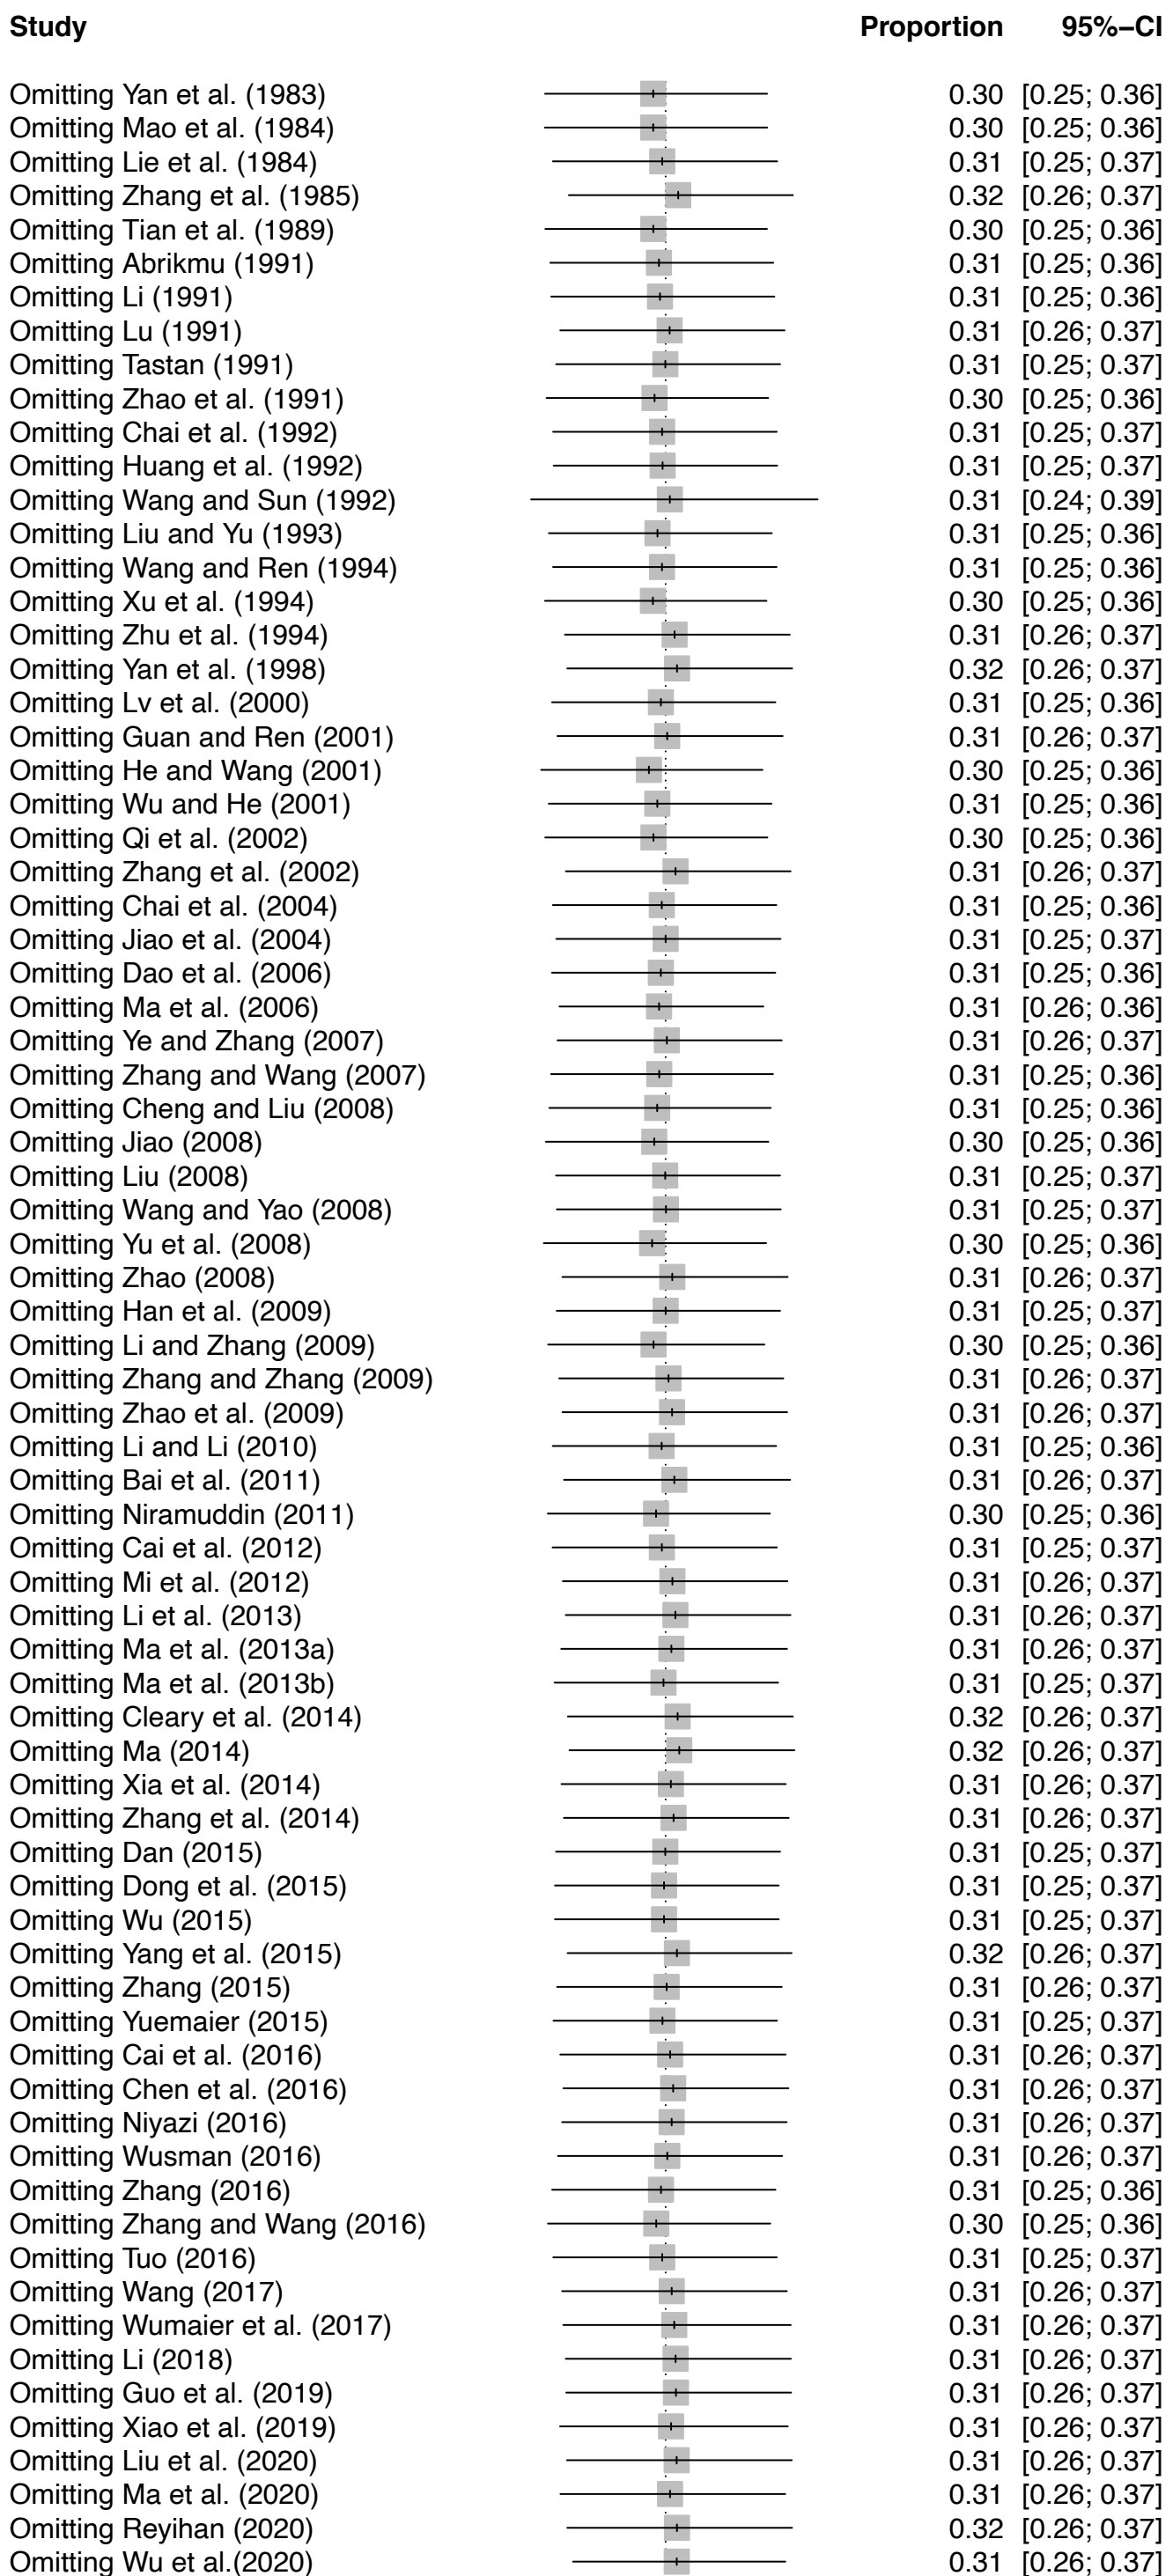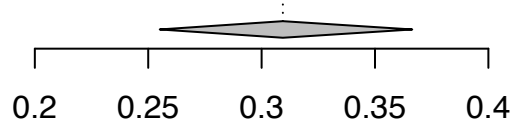

Figure S4 Sensitivity analysis
